# Supplementary material
Source: Springer Nature journal article supplement (https://www.springermedizin.de/resource/supplementary/12889_2012_4554_MOESM6_ESM.pdf/9493432)
Supplement: MOESM6 [file 9493432]

Additional file 6. Crude prevalence of risk factors for noncommunicable diseases among adults aged 18 or higher living in 48 low- and middle-income countries, by education, World Health Survey 2002-04

|       |                             | Current daily smokers           |             |      | Low-fruit/vegetable consumers <sup>a</sup> |             |      | Physically inactive people <sup>b</sup> |             |      | Heavy episodic alcohol drinkers <sup>c</sup> |             |      |      |
|-------|-----------------------------|---------------------------------|-------------|------|--------------------------------------------|-------------|------|-----------------------------------------|-------------|------|----------------------------------------------|-------------|------|------|
|       |                             | Estimate                        | 95% CI      |      | Estimate                                   | 95% CI      |      | Estimate                                | 95% CI      |      | Estimate                                     | 95% CI      |      |      |
| Men   | Middle-income country group | No formal schooling             | <b>36.2</b> | 32.9 | 39.5                                       | <b>84.6</b> | 81.7 | 87.5                                    | <b>19.2</b> | 15.2 | 23.1                                         | <b>6.1</b>  | 4.4  | 7.9  |
|       |                             | Less than primary school        | <b>32.7</b> | 29.9 | 35.6                                       | <b>74.1</b> | 71.2 | 77.1                                    | <b>17.1</b> | 14.4 | 19.9                                         | <b>12.6</b> | 10.7 | 14.5 |
|       |                             | Primary school completed        | <b>31.1</b> | 29.1 | 33.1                                       | <b>75.7</b> | 73.7 | 77.7                                    | <b>14.5</b> | 12.6 | 16.4                                         | <b>14.2</b> | 12.5 | 15.9 |
|       |                             | Secondary/high school completed | <b>26.5</b> | 25.3 | 27.8                                       | <b>72.0</b> | 69.9 | 74.2                                    | <b>12.0</b> | 11.0 | 13.0                                         | <b>13.8</b> | 12.8 | 14.9 |
|       |                             | College completed or above      | <b>29.6</b> | 27.0 | 32.2                                       | <b>72.1</b> | 68.7 | 75.5                                    | <b>10.7</b> | 8.5  | 13.0                                         | <b>15.7</b> | 13.4 | 18.0 |
|       | Low-income country group    | No formal schooling             | <b>38.5</b> | 36.2 | 40.9                                       | <b>79.3</b> | 77.0 | 81.7                                    | <b>6.9</b>  | 5.5  | 8.3                                          | <b>3.7</b>  | 3.0  | 4.4  |
|       |                             | Less than primary school        | <b>35.2</b> | 32.6 | 37.9                                       | <b>70.2</b> | 67.2 | 73.1                                    | <b>4.2</b>  | 3.3  | 5.1                                          | <b>4.7</b>  | 3.9  | 5.5  |
|       |                             | Primary school completed        | <b>28.1</b> | 26.2 | 30.0                                       | <b>71.2</b> | 68.6 | 73.7                                    | <b>5.8</b>  | 4.6  | 7.0                                          | <b>3.1</b>  | 2.6  | 3.6  |
|       |                             | Secondary/high school completed | <b>22.2</b> | 20.5 | 24.0                                       | <b>76.0</b> | 73.6 | 78.5                                    | <b>6.5</b>  | 5.2  | 7.7                                          | <b>3.3</b>  | 2.6  | 4.1  |
|       |                             | College completed or above      | <b>15.8</b> | 12.8 | 18.9                                       | <b>73.5</b> | 69.9 | 77.2                                    | <b>8.2</b>  | 6.0  | 10.5                                         | <b>2.7</b>  | 1.1  | 4.4  |
| Women | Middle-income country group | No formal schooling             | <b>9.3</b>  | 7.4  | 11.2                                       | <b>88.3</b> | 86.3 | 90.2                                    | <b>24.4</b> | 20.6 | 28.2                                         | <b>1.4</b>  | 0.7  | 2.1  |
|       |                             | Less than primary school        | <b>13.3</b> | 11.2 | 15.5                                       | <b>76.8</b> | 74.0 | 79.6                                    | <b>20.9</b> | 17.7 | 24.1                                         | <b>3.2</b>  | 2.2  | 4.1  |
|       |                             | Primary school completed        | <b>10.4</b> | 9.1  | 11.7                                       | <b>74.1</b> | 71.9 | 76.3                                    | <b>14.9</b> | 13.2 | 16.6                                         | <b>3.2</b>  | 2.4  | 3.9  |
|       |                             | Secondary/high school completed | <b>7.0</b>  | 6.4  | 7.6                                        | <b>72.1</b> | 70.2 | 74.1                                    | <b>13.2</b> | 12.2 | 14.2                                         | <b>3.3</b>  | 2.9  | 3.8  |
|       |                             | College completed or above      | <b>7.4</b>  | 6.1  | 8.8                                        | <b>71.1</b> | 68.1 | 74.2                                    | <b>9.3</b>  | 7.6  | 10.9                                         | <b>4.3</b>  | 3.4  | 5.2  |
|       | Low-income country group    | No formal schooling             | <b>7.1</b>  | 6.2  | 8.0                                        | <b>79.7</b> | 77.6 | 81.8                                    | <b>15.4</b> | 14.0 | 16.7                                         | <b>1.5</b>  | 1.2  | 1.9  |
|       |                             | Less than primary school        | <b>4.4</b>  | 3.4  | 5.3                                        | <b>67.7</b> | 65.0 | 70.4                                    | <b>11.8</b> | 10.1 | 13.5                                         | <b>0.6</b>  | 0.4  | 0.8  |
|       |                             | Primary school completed        | <b>1.9</b>  | 1.2  | 2.5                                        | <b>65.4</b> | 62.7 | 68.0                                    | <b>12.3</b> | 10.5 | 14.0                                         | <b>0.5</b>  | 0.3  | 0.7  |
|       |                             | Secondary/high school completed | <b>1.4</b>  | 0.5  | 2.4                                        | <b>75.5</b> | 72.6 | 78.4                                    | <b>13.3</b> | 11.2 | 15.5                                         | <b>0.5</b>  | 0.2  | 0.9  |
|       |                             | College completed or above      | <b>0.4</b>  | 0.1  | 0.7                                        | <b>77.2</b> | 73.0 | 81.4                                    | <b>15.9</b> | 12.0 | 19.9                                         | <b>0.5</b>  | 0.1  | 0.9  |

Abbreviations: 95% CI, 95% Confidence Interval

All numbers are in percentage

<sup>a</sup> No data were available for Mexico

<sup>b</sup> No data were available for Morocco and Latvia

<sup>c</sup> Mauritania; and Bosnia-Herzegovina, Comoros, Mauritania and Pakistan were excluded from males and females datasets, respectively
